# Supplementary material
Source: Springer Nature journal article supplement (https://www.springermedizin.de/resource/supplementary/12943_2010_604_MOESM3_ESM.pdf/9555090)

**A**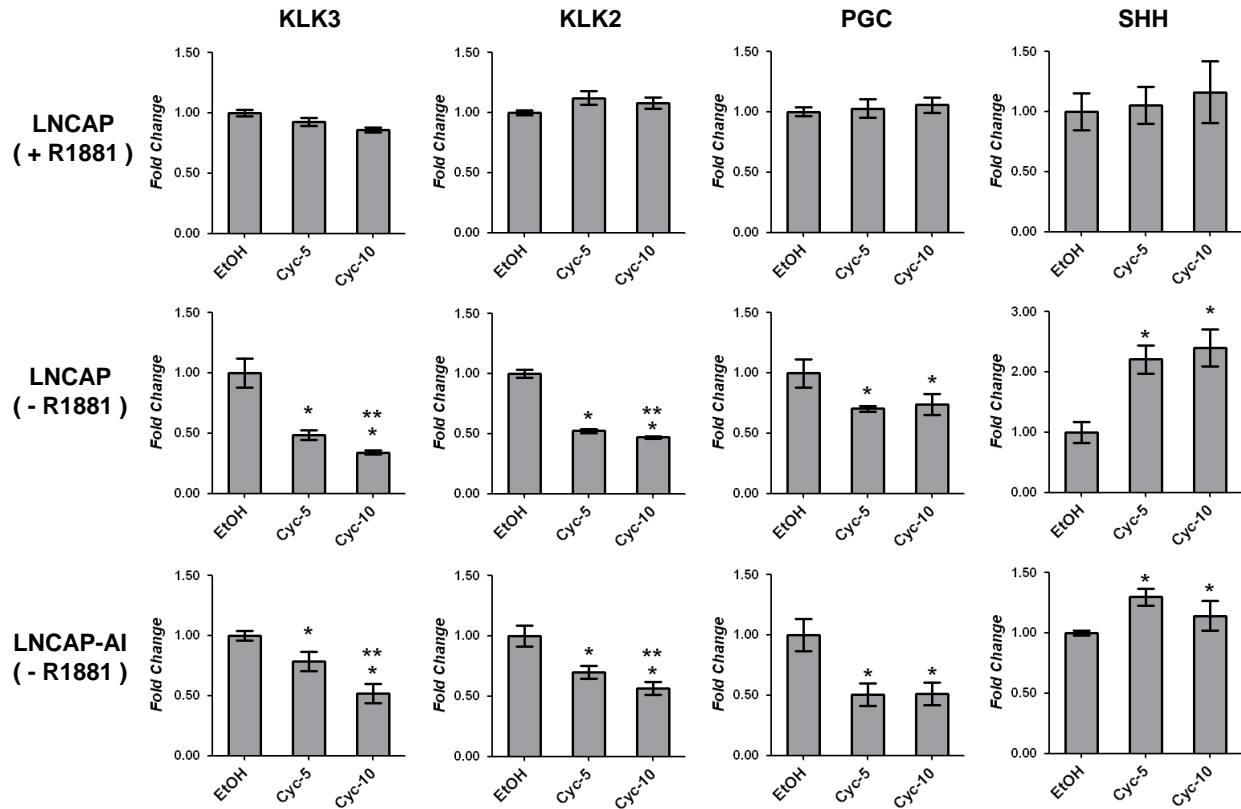**B**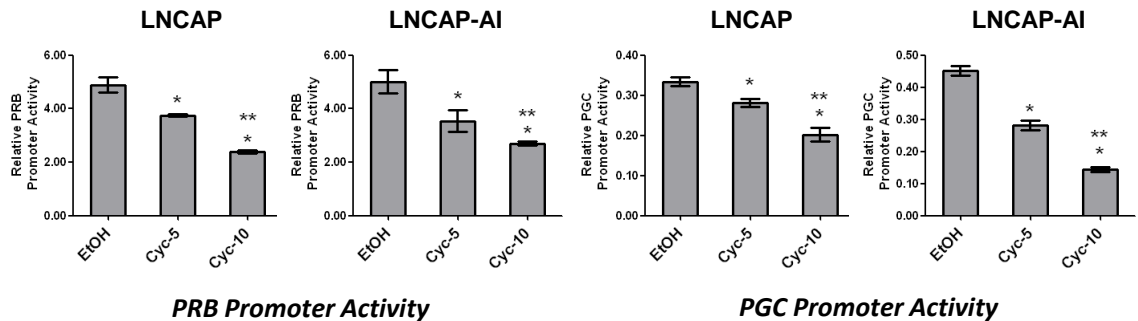

Supplement: MOESM3 [file 9555090]
